# Supplementary material for: All-alike hollow nanotubes of g-C3N4 converting photons into fuel by splitting water
Source: Royal Society of Chemistry journal article supplement (doi:10.1039/d3cc01028g), 2023-01-01
Supplement: d3cc01028g1.pdf [file d3cc01028g1.pdf]

***-Electronic Supplementary Information (ESI)-***

**All-alike hollow nanotubes of g-C<sub>3</sub>N<sub>4</sub> Converting Photons into Fuel by Splitting Water**

Mani Preeyanghaa, <sup>a</sup> Chitiphon Chuaicham, <sup>b</sup> Sulakshana Shenoy, <sup>b</sup> Bernaurdshaw

Neppolian, <sup>c</sup> Keiko Sasaki, <sup>b\*</sup> Karthikeyan Sekar, <sup>b,c\*</sup>

*<sup>a</sup>Department of Physics and Nanotechnology, SRM Institute of Science and Technology,*

*Kattankulathur, Chennai, 603203, India*

*<sup>b</sup>Department of Earth Resources Engineering, Faculty of Engineering, Kyushu University,*

*744 Motooka, Nishiku, Fukuoka 819-0395, Japan*

*<sup>c</sup>Department of Chemistry, SRM Institute of Science and Technology, Kattankulathur,*

*Chennai, 603203, India*

\*Corresponding Authors: Email: [keikos@mine.kyushu-u.ac.jp](mailto:keikos@mine.kyushu-u.ac.jp); [kart@mine.kyushu-u.ac.jp](mailto:kart@mine.kyushu-u.ac.jp).

## EXPERIMENTAL SECTION

### Synthesis of HTC� and NSCN

All the raw materials were of analytical grade and used without further purification. Typically, the powders of urea and melamine were combined with oxalic acid (**Table S1**) and granulated uniformly using mortar and pestle. Subsequently, the precursor was transferred into a closed ceramic crucible and maintained at 520 °C for 2 h with a heating rate of 5 °C/min in a muffle furnace. After cooled to room temperature, the resulting material (denoted as HTC�(x)) was collected and granulated to a fine powder. For comparison, the pristine CN (denoted as NSCN) was also prepared by direct polymerization of urea as a precursor at 520 °C for 2 h.

**Table S1. Synthesis of HTC�(x) by varying the proportion of N<sub>2</sub>-rich CN precursors.**

| Urea (g) | Melamine (g) | Oxalic acid (g) | Sample yield (g) | Sample label   |
|----------|--------------|-----------------|------------------|----------------|
| 4        | 0.5          | 0.5             | 0.05             | HTC�(1)        |
| 3.5      | 1            | 0.5             | 0.1              | HTC�(2)        |
| 2.5      | 2            | 0.5             | 0.34             | HTC�(3)        |
| <b>2</b> | <b>2.5</b>   | <b>0.5</b>      | <b>1.46</b>      | <b>HTC�(4)</b> |
| 1.5      | 3            | 0.5             | 1.63             | HTC�(5)        |
| 1        | 3.5          | 0.5             | 1.85             | HTC�(6)        |

### Characterization

The powder X-ray diffraction (XRD) patterns were acquired using a Cu K $\alpha$  radiation source on a Rigaku Ultima IV powder X-ray diffractometer. Fourier-transform infrared (FT-IR) spectra were obtained on the Jasco FTIR-670 Plus. X-ray photoelectron spectroscopy (XPS) spectra were carried out on a ULVAC-PHI ESCA 5800 XPS Microprobe with an Al K $\alpha$  excitation source. All spectra were corrected based on standard C1s peak at 284.6 eV. The morphology and elemental composition were examined using field emission scanning electron

microscopy (FE-SEM, ZEISS Ultra-55) and high-resolution transmission electron microscopy (HRTEM, JEOL JEM-2100HCKM). High-angle annular dark field scanning TEM (HAADF-STEM) coupled with energy dispersive spectroscopy (EDS) elemental mapping were also recorded. The multipoint Brunauer-Emmett-Teller (BET) and Barrett-Joyner-Halenda (BJH) were determined by BEL-Max N<sub>2</sub> porosimeter. A UV-vis spectrophotometer (Shimadzu UV-2450) was used to record UV-vis diffused reflectance (UV-DRS) spectra. The photoluminescence (PL) spectra were measured using a fluorescence spectrophotometer (JASCO F-6600).

### **Reversed double-beam photoacoustic spectroscopy (RDB-PAS)**

A sample container containing ~200 mg of synthesized products was placed in a PAS cell equipped with an electret condenser microphone and quartz window on the upper side, which was infused with methanol-saturated N<sub>2</sub> gas for 30 min before being firmly closed. A grating monochromator attached to a Xe lamp was controlled at 80 Hz by a light chopper that transmitted a beam of light over the wavelength range of 650–350 nm via a cell window and the PA signal was monitored using a digital lock-in amplifier. Based on the amount of photoabsorption change for accumulated electrons, the energy-resolved distribution of electron traps (ERDT)/conduction-band bottom (CBB) patterns were measured for the synthesized samples.

### **Photoelectrochemical characterization**

The Mott-Schottky, electrochemical impedance spectroscopy (EIS) and transient photocurrent (TPC) response of the synthesized products were measured using an Autolab potentiostat electrochemical workstation. A three-electrode cell system was used comprising a Pt wire counter electrode, Hg/Hg<sub>2</sub>SO<sub>4</sub> reference electrode and glassy carbon (GC) working electrode in 0.5 M Na<sub>2</sub>SO<sub>4</sub> electrolyte solution. The working electrode was prepared as follows: 5 mg synthesized product was uniformly dispersed in 0.5 mL Nafion containing 1:1 v/v of a

water/ethanol mixture. After 30 min of ultrasonication, 5  $\mu$ L of homogeneous colloidal solution was drop cast onto the GC electrode (3 mm diameter) and dried at ambient temperature. EIS Nyquist plots were recorded with a 10 mV AC signal in the frequency range of 100 kHz to 0.1 Hz. The light source used for measuring the TPC response was a 200 W Hg-Xe arc lamp.

### Photocatalytic hydrogen production

Typically, 20 mg of synthesized products was uniformly dispersed in 50 mL of distilled water containing 10 vol% triethanolamine (TEOA) of sacrificial agent and 1 wt% Pt as cocatalysts using an ultrasonicator. Prior to UV-Vis light irradiation, the N<sub>2</sub> gas was continuously purged in a sealed quartz photoreactor for 30 min to remove all the dissolved oxygen from the reaction mixture. The evolved gas was collected in a 1 mL airtight syringe at a periodic interval and analysed using gas chromatography (Shimadzu Nexis GC-2030).

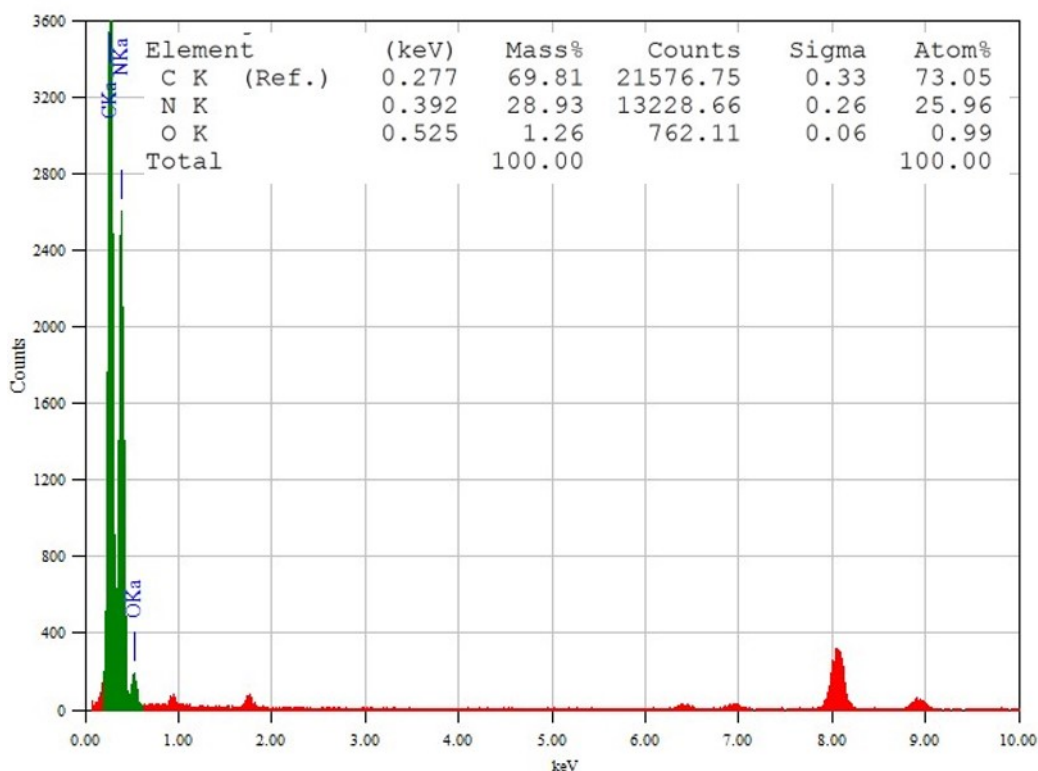

**Fig. S1. EDS spectra of HTC/N.**

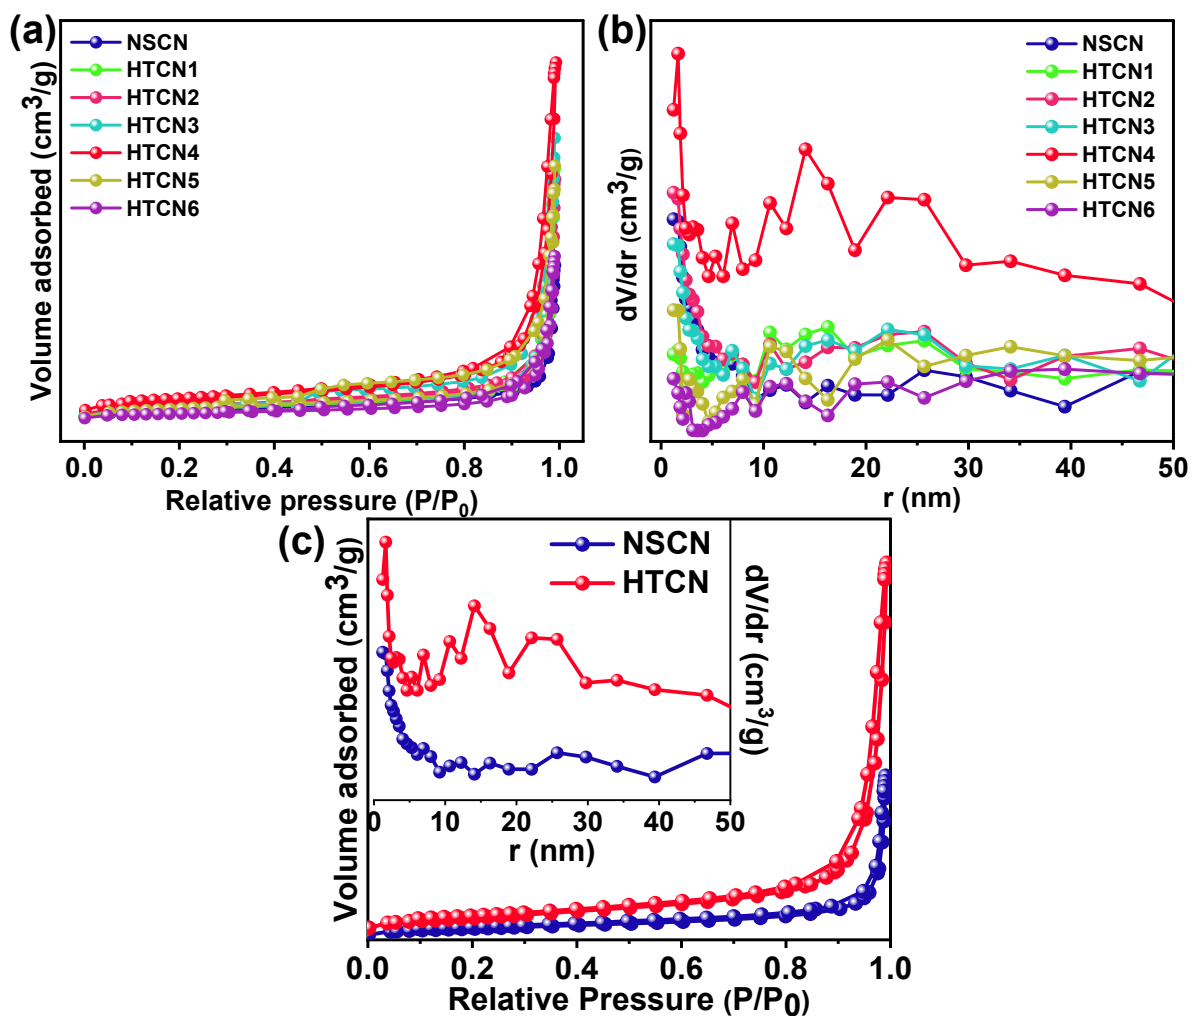

**Fig. S2. (a-c) N<sub>2</sub> adsorption-desorption isotherms, BJH pore size distributions of NSCN and HTCNC(x).**

**Table S2. The BET SSA and BJH pore volume of NSCN and HTCNC(x).**

| Catalysts | Surface area (m <sup>2</sup> /g) | Pore volume (cm <sup>3</sup> /g) |
|-----------|----------------------------------|----------------------------------|
| NSCN      | 48                               | 0.27                             |
| HTCNC(1)  | 54                               | 0.31                             |
| HTCNC(2)  | 63                               | 0.43                             |
| HTCNC(3)  | 76                               | 0.47                             |
| HTCNC(4)  | 92                               | 0.59                             |
| HTCNC(5)  | 71                               | 0.36                             |
| HTCNC(6)  | 34                               | 0.18                             |

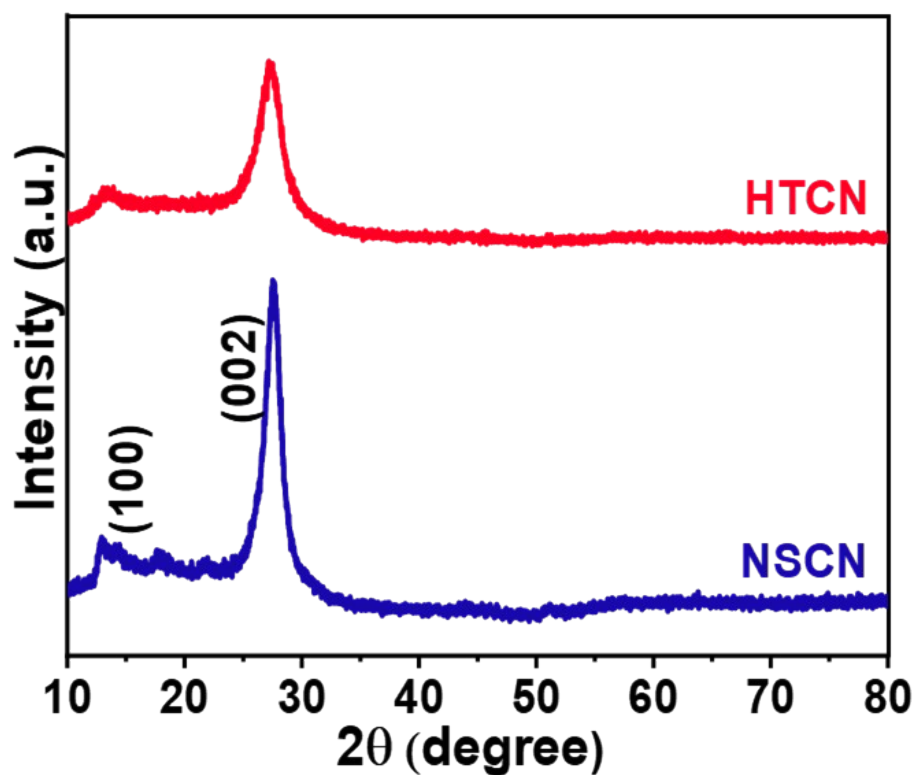

Fig. S3. XRD patterns of NSCN and HTCN.

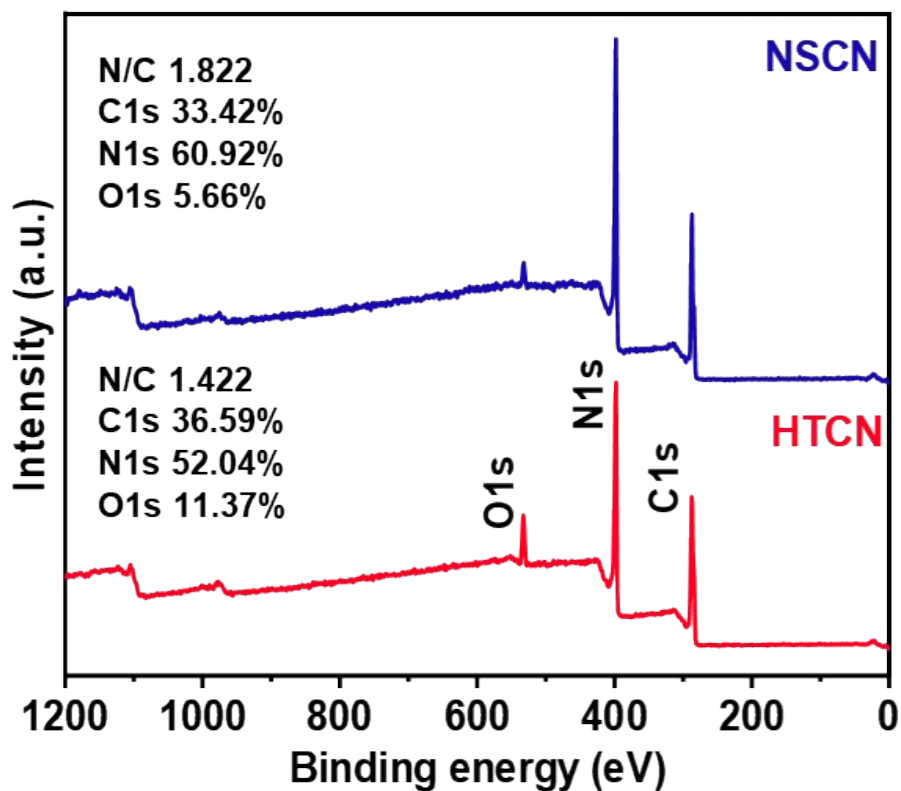

Fig. S4. XPS wide scan survey spectra of NSCN and HTCN.

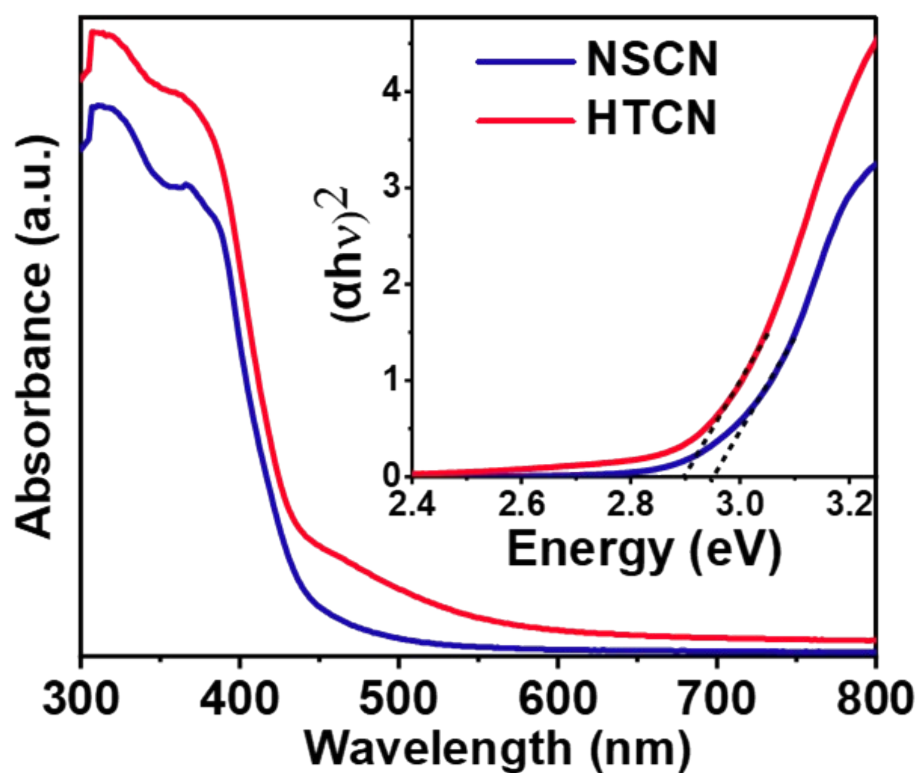

Fig. S5. UV-vis DRS spectra with Tauc plot (inset) of NSCN and HTCN.

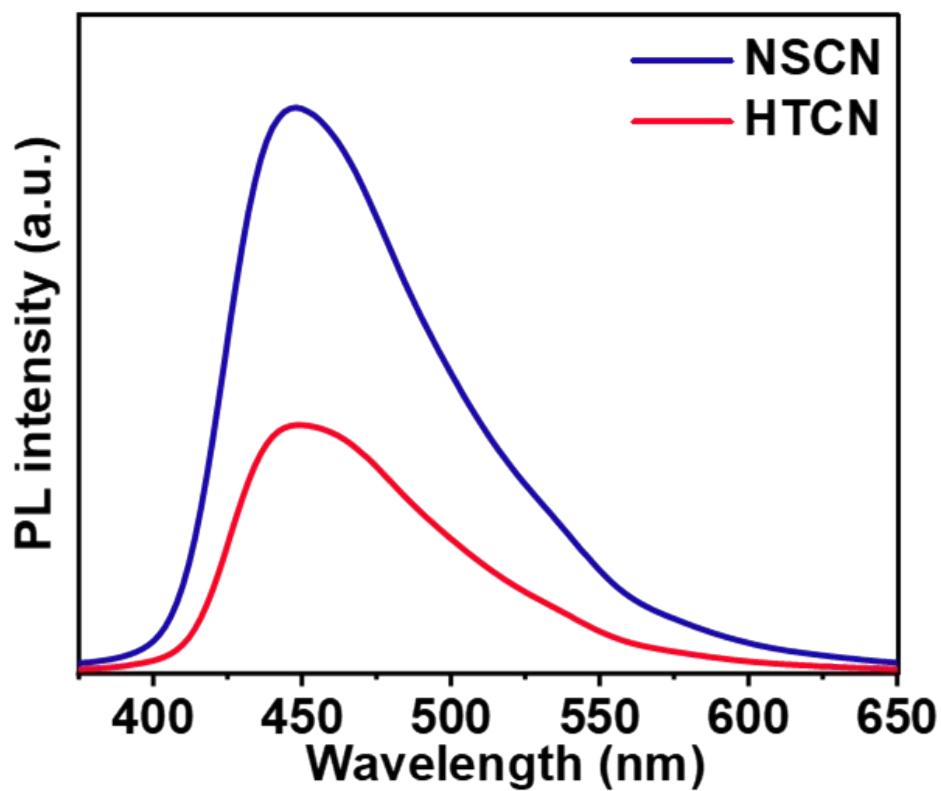

Fig. S6. PL spectra of NSCN and HTCN.

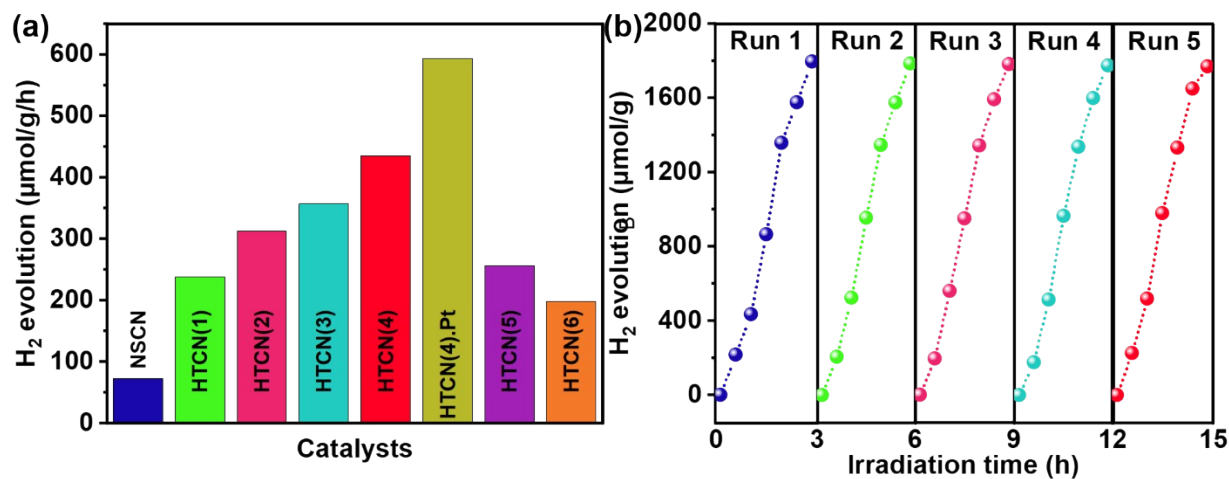

Fig. S7. (a) Comparison of the photocatalytic H<sub>2</sub> evolution rate of NSCN and HTCn(x).

(b) Cycling test of photocatalytic H<sub>2</sub> evolution of HTCn.

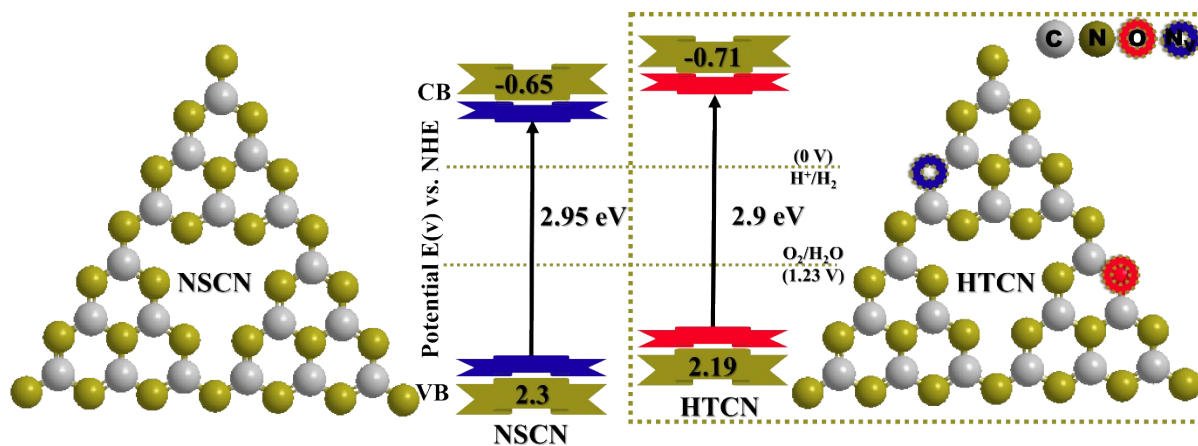

Scheme S1. Electronic band structures with schematic illustration of NSCN and HTCn.

**Table S3. Comparison of synthesis method and photocatalytic performance of varying CN nanotubes.**

| <b>Catalysts</b>                                      | <b>Synthesis Method</b>                                                                                                         | <b>Bandgap (eV)</b> | <b>H<sub>2</sub> Evolution Rate</b> | <b>Ref.</b>  |
|-------------------------------------------------------|---------------------------------------------------------------------------------------------------------------------------------|---------------------|-------------------------------------|--------------|
| Pt-deposited hexagonal CN nanotubes                   | Hexagonal precursor rods by Hydrothermal process using bulk CN and further heat-treated to obtain CN nanotubes                  | 2.35                | 4779.8 $\mu\text{mol/g/h}$ With Pt  | 1            |
| Halloysite-derived mesoporous CN nanotubes            | CN loaded on the acid-treated halloysite templates via a facial melamine-involved vapor deposition method                       | 2.95                | 633 $\mu\text{mol/g/h}$ With Pt     | 2            |
| 1T'-ReS <sub>2</sub> nanosheets modified CN nanotubes | CN nanotubes were prepared through the hydrothermal reaction, freeze-drying and heat treatment in sequence                      | 2.34                | 61 $\mu\text{mol/g/h}$              | 3            |
| CN tubes                                              | Hexagonal columnar crystals assembled by melamine and cyanuric acid were calcined in tube furnace under argon atmosphere        | 2.67                | 343.5 $\mu\text{mol/g/h}$ With Pt   | 4            |
| g-C <sub>3</sub> N <sub>4</sub> microrods             | Bulk structure of g-C <sub>3</sub> N <sub>4</sub> was degraded into nanoporous microrods via chemical means at room temperature | 2.72                | 8.5 $\mu\text{mol/g/h}$             | 5            |
| Hierarchical porous CN hollow nanotubes               | Thermal polycondensation of oxalic acid-assisted urea and melamine supramolecular aggregates                                    | 2.9                 | 435 $\mu\text{mol/g/h}$ Without Pt  | Current Work |

## References

1. Z. Jiang, C. Jia, B. Wang, P. Yang and G. Gao, *J. Alloys Compd.*, 2020, 826, 154145.
2. W. Wang, Z. Shu, J. Zhou, T. Li, P. Duan, Z. Zhao, Y. Tan, C. Xie and S. Cui, *Appl. Clay Sci.*, 2018, 158, 143–149.
3. X. Wang, Y. Xue, Z. Liang, J. Tian, X. Zhang and X. Chen, *Mater. Today Adv.*, 2022, 15, 100257.
4. Yang, B., Han, J., Zhang, Q., Liao, G., Cheng, W., Ge, G., Liu, J., Yang, X., Wang, R. and Jia, X., *Carbon*, 2023, 202, 348-357.
5. Pawar, R.C., Kang, S., Park, J.H., Kim, J.H., Ahn, S. and Lee, C.S., *Scientific reports*, 2016, 6(1), 31147.
